# Supplementary material for: A healthy lifestyle mitigates the risk of heart disease related to type 2 diabetes: a prospective nested case–control study in a nationwide Swedish twin cohort
Source: Springer Nature journal article supplement (doi:10.1007/s00125-020-05324-z), 2020-11-10
Supplement: MOESM1 [file 18572386]

## **Electronic supplementary material (ESM)**

**ESM Table 1.** Odds ratios (ORs) and 95% confidence intervals (CIs) of heart disease in relation to lifestyle among people with and without type 2 diabetes from Generalized Estimating Equation models (unfavourable lifestyle as reference)

**ESM Table 2.** Additive interaction between lifestyle and type 2 diabetes (T2D) for the risk of heart disease.

**ESM Table 3.** Odds ratios (ORs) and 95% confidence intervals (CIs) of different forms of heart disease related to type 2 diabetes from Generalized Estimating Equation models (type 2 diabetes-free as the reference) among men and women

**ESM Table 4.** Odds ratios (ORs) and 95% confidence intervals (CIs) of different forms of heart disease related to type 2 diabetes (type 2 diabetes-free as the reference) from Generalized Estimating Equation models further adjusted for survival status.

**ESM Table 5.** Odds ratios (ORs) and 95% confidence intervals (CIs) of different forms of heart disease related to type 2 diabetes (type 2 diabetes-free as the reference) from Generalized Estimating Equation models using data available (excluding data with missing values for covariate) (n=35,445)

**ESM Table 1.** Odds ratios (ORs) and 95% confidence intervals (CIs) of heart disease in relation to lifestyle among people with and without type 2 diabetes from Generalized Estimating Equation models (unfavourable lifestyle as reference)

| Lifestyle    | type 2 diabetes |       |                             |                             | type 2 diabetes-free |       |                             |                             |
|--------------|-----------------|-------|-----------------------------|-----------------------------|----------------------|-------|-----------------------------|-----------------------------|
|              | Subjects        | Cases | Basic-adjusted OR (95% CI)* | Multi-adjusted OR (95% CI)† | Subjects             | Cases | Basic-adjusted OR (95% CI)* | Multi-adjusted OR (95% CI)† |
| Unfavourable | 211             | 143   | Reference                   | Reference                   | 2404                 | 550   | Reference                   | Reference                   |
| Intermediate | 1713            | 1060  | 0.76 (0.56, 1.03)           | 0.68 (0.49, 0.93)           | 26830                | 5578  | 0.87 (0.79, 0.96)           | 0.74 (0.66, 0.82)           |
| Favourable   | 380             | 201   | 0.52 (0.37, 0.74)           | 0.44 (0.30, 0.63)           | 9925                 | 1730  | 0.70 (0.63, 0.78)           | 0.55 (0.49, 0.62)           |

\* Unadjusted.

† Adjusted for age, sex, education, and marital status.

**ESM Table 2.** Additive interaction between lifestyle and type 2 diabetes (T2D) for the risk of heart disease

| Joint exposure           |     | No. of subjects | Heart disease |                             |                             |
|--------------------------|-----|-----------------|---------------|-----------------------------|-----------------------------|
| Lifestyle                | T2D |                 | Cases         | Basic-adjusted OR (95% CI)* | Multi-adjusted OR (95% CI)† |
| Intermediate/ Favourable | No  | 36,755          | 7308          | Reference                   | Reference                   |
| Unfavourable             | No  | 2404            | 550           | 1.21 (1.10, 1.34)           | 1.42 (1.28, 1.57)           |
| Intermediate/ Favourable | Yes | 2093            | 1261          | 5.87 (5.35, 6.43)           | 4.54 (4.10, 5.04)           |
| Unfavourable             | Yes | 211             | 143           | 8.39 (6.22, 11.31)          | 8.47 (6.14 11.69)           |

\* Unadjusted.

† Adjusted for age, sex, education, marital status.

Measures of additive interaction for heart disease:

Relative excess risk due to interaction (RERI): 3.507, 95% CI: 0.929, 6.084

Attributable proportion due to interaction (AP): 0.414, 95% CI: 0.231, 0.597

Synergy index (SI): 1.885, 95% CI: 1.318, 2.696

**ESM Table 3.** Odds ratios (ORs) and 95% confidence intervals (CIs) of different forms of heart disease related to type 2 diabetes from Generalized Estimating Equation models (type 2 diabetes-free as the reference) among men and women

| Heart Disease                   | Males |                     |                    | Females |                     |                   |
|---------------------------------|-------|---------------------|--------------------|---------|---------------------|-------------------|
|                                 | Cases | OR (95% CI)*        | OR (95% CI)†       | Cases   | OR (95% CI)*        | OR (95% CI)†      |
| All types heart Disease         | 4955  | 4.45 (3.87, 5.10)   | 4.10 (3.57, 4.70)  | 4307    | 5.06 (4.40, 5.82)   | 4.71 (4.09, 5.43) |
| Coronary heart disease          | 2568  | 4.48 (3.82, 5.25)   | 4.20 (3.58, 4.93)  | 1835    | 6.10 (5.17, 7.20)   | 5.75 (4.86, 6.80) |
| Angina pectoris                 | 1060  | 4.01 (3.24, 4.96)   | 3.79 (3.07, 4.69)  | 876     | 5.28 (4.23, 6.59)   | 4.91 (3.92, 6.15) |
| Acute myocardial infarction     | 1296  | 4.32 (3.55, 5.26)   | 4.12 (3.38, 5.02)  | 793     | 6.58 (5.31, 8.17)   | 6.31 (5.06, 7.86) |
| Chronic ischemic heart disease  | 205   | 5.13 (3.47, 7.60)   | 4.70 (3.16, 6.99)  | 157     | 6.01 (3.86, 9.36)   | 5.86 (3.74, 9.16) |
| Other coronary heart disease    | 7     | 20.70 (4.50, 95.22) | -                  | 9       | 10.99 (1.89, 63.74) | -                 |
| Cardiac arrhythmias             | 1750  | 3.42 (2.83, 4.13)   | 3.24 (2.69, 3.91)  | 1721    | 3.30 (2.71, 4.02)   | 3.07 (2.52, 3.74) |
| Atrial fibrillation and flutter | 1484  | 3.47 (2.84, 4.23)   | 3.27 (2.68, 3.99)  | 1351    | 3.35 (2.70, 4.17)   | 3.04 (2.45, 3.78) |
| Other cardiac arrhythmias       | 266   | 3.03 (1.99, 4.63)   | 3.04 (1.99, 4.65)  | 370     | 3.02 (2.05, 4.44)   | 3.05 (2.07, 4.50) |
| Heart failure                   | 637   | 5.13 (3.98, 6.62)   | 4.61 (3.57, 5.96)  | 751     | 5.51 (4.31, 7.05)   | 5.16 (4.02, 6.62) |
| Congestive heart failure        | 87    | 7.59 (4.54, 12.69)  | 6.92 (4.19, 11.41) | 94      | 5.17 (2.92, 9.16)   | 4.57 (2.57, 8.15) |
| Left ventricular failure        | 48    | 5.07 (2.40, 10.73)  | 4.93 (2.35, 10.37) | 62      | 4.80 (2.32, 9.92)   | 4.12 (2.02, 8.44) |
| Unspecified heart failure       | 502   | 4.47 (3.37, 5.92)   | 3.98 (2.99, 5.30)  | 595     | 5.29 (4.06, 6.89)   | 5.10 (3.89, 6.68) |

\* Adjusted for age and education.

† Adjusted for age, education, marital status, body mass index, smoking, alcohol consumption, and physical activity.

**ESM Table 4.** Odds ratios (ORs) and 95% confidence intervals (CIs) of different forms of heart disease related to type 2 diabetes (type 2 diabetes-free as the reference) from Generalized Estimating Equation models further adjusted for survival status.

| Heart Disease                   | No. of Cases | OR (95% CI)*        |
|---------------------------------|--------------|---------------------|
| All types heart Disease         | 9262         | 4.30 (3.90, 4.75)   |
| Coronary heart disease          | 4403         | 4.84 (4.31, 5.45)   |
| Angina pectoris                 | 1936         | 4.39 (3.75, 5.13)   |
| Acute myocardial infarction     | 2089         | 4.81 (4.14, 5.58)   |
| Chronic ischemic heart disease  | 362          | 5.13 (3.81, 6.91)   |
| Other coronary heart disease    | 16           | 14.73 (4.34, 49.96) |
| Cardiac arrhythmias             | 3471         | 3.14 (2.74, 3.60)   |
| Atrial fibrillation and flutter | 2835         | 3.12 (2.69, 3.61)   |
| Other cardiac arrhythmias       | 636          | 3.20 (2.40, 4.27)   |
| Heart failure                   | 1388         | 4.44 (3.70, 5.33)   |
| Congestive heart failure        | 181          | 4.86 (3.35, 7.06)   |
| Left ventricular failure        | 110          | 3.90 (2.33, 6.53)   |
| Unspecified heart failure       | 1097         | 4.16 (3.41, 5.08)   |

\* Adjusted for age, sex, education, marital status, body mass index, smoking, alcohol consumption, physical activity, and death.

**ESM Table 5.** Odds ratios (ORs) and 95% confidence intervals (CIs) of different forms of heart disease related to type 2 diabetes (type 2 diabetes-free as the reference) from Generalized Estimating Equation models using data available (excluding data with missing values for covariate) (n=35,445)

| Heart Disease                   | No. of Cases | OR (95% CI)*        |
|---------------------------------|--------------|---------------------|
| All types heart Disease         | 6654         | 4.85 (4.32, 5.43)   |
| Coronary heart disease          | 3374         |                     |
| Angina pectoris                 | 1567         | 4.40 (3.67, 5.27)   |
| Acute myocardial infarction     | 1513         | 5.35 (4.50, 6.37)   |
| Chronic ischemic heart disease  | 279          | 5.07 (3.56, 7.23)   |
| Other coronary heart disease    | 15           | 16.80 (5.13, 54.98) |
| Cardiac arrhythmias             | 2554         |                     |
| Atrial fibrillation and flutter | 1992         | 3.66 (3.09, 4.33)   |
| Other cardiac arrhythmias       | 562          | 3.29 (2.42, 4.47)   |
| Heart failure                   | 726          |                     |
| Congestive heart failure        | 95           | 9.58 (5.96, 15.37)  |
| Left ventricular failure        | 62           | 7.10 (3.72, 13.56)  |
| Unspecified heart failure       | 569          | 5.92 (4.65, 7.54)   |

\* Adjusted for age, sex, education, marital status, body mass index, smoking, alcohol consumption, and physical activity.
